# Supplementary material for: The Association between Red Blood Cell Distribution Width and Mortality Risk after Hip Fracture: A Meta-Analysis
Source: MDPI journal article supplement (doi:10.3390/medicina60030485), 2024-03-14
Supplement: s1 [file s1]

# The Association Between Red Blood Cell Distribution Width and Mortality Risk After Hip Fractures: A Meta-Analysis

## SUPPLEMENTARY MATERIALS

### Supplementary Tables

**Table S1.** Characteristics of included studies

| No. | Author (year)          | Country        | Design                               | Model            | Sample size<br>n = 5834 | Women<br>n = 3593 | Cut-off         | Mean age (years)<br>87.61 ± 3.21 | Follow-up<br>timepoint | Confounders/Matching                                                                                                                                                                                 | HR<br>provided |
|-----|------------------------|----------------|--------------------------------------|------------------|-------------------------|-------------------|-----------------|----------------------------------|------------------------|------------------------------------------------------------------------------------------------------------------------------------------------------------------------------------------------------|----------------|
| 1   | Cruz-Vargas (2019)[14] | Peru           | Retrospective and prospective cohort | Preoperative RDW | 99                      | 64                | 14.1%           | 83.15<br>D: NA<br>S: NA          | 6 months               | NR                                                                                                                                                                                                   | No             |
| 2   | Emektar (2017)[31]     | Türkiye        | Retrospective case-control           | Admission RDW    | 560                     | 348               | NR              | 78.99<br>D: 81.68<br>S: 78.69    | 1 year                 | Age, sex, comorbidities, hemoglobin level, WBC count, lymphocyte count, neutrophil count, MPV, RDW, and type of fracture                                                                             | Yes            |
| 3   | Garbharran (2013)[11]  | United Kingdom | Prospective cohort                   | Preoperative RDW | 698                     | 465               | Fourth quartile | 78<br>D: NA<br>S: NA             | 1 year                 | Admission RDW, Hb, MCV, age, sex, prefracture residence, supporting indoor mobilization, ASA ≥3, CCI, postoperative delirium, cardiac, respiratory and GI complications, serum creatinine >120mmol/l | Yes            |
| 4   | Hamdan (2021)[32]      | Jordan         | Retrospective cohort                 | Preoperative RDW | 549                     | 274               | 15%             | 76.42<br>D: 79.76<br>S: 75.94    | 6 months               | Age, sex, RDW grouped values, type of fracture, cardiovascular disease                                                                                                                               | No             |
| 5   | Karadeniz (2022)[33]   | Türkiye        | Retrospective cohort                 | Preoperative RDW | 190                     | 127               | 14.5%           | 82.8<br>D: 84.2<br>S: 82.1       | 1 year                 | NR                                                                                                                                                                                                   | No             |

|    |                       |         |                            |                  |      |      |                 |                              |                                           |                                                                                                                                                                         |     |
|----|-----------------------|---------|----------------------------|------------------|------|------|-----------------|------------------------------|-------------------------------------------|-------------------------------------------------------------------------------------------------------------------------------------------------------------------------|-----|
| 6  | Lv (2015)[12]         | China   | Prospective cohort         | Admission RDW    | 1479 | 864  | Fourth quartile | 73.75<br>D: NA<br>S: NA      | 2 years                                   | Age, prior myocardial infarction, chronic renal failure, ASA score, treatment, in-hospital pneumonia, and in-hospital circulatory complication                          | Yes |
| 7  | Marom (2022)[13]      | Israel  | Retrospective cohort       | Preoperative RDW | 1574 | 1082 | 14.5%           | 90.77<br>D: NA<br>S: NA      | 1 year<br>6 months                        | Comorbidities, serum analysis findings, surgeon's seniority                                                                                                             | No  |
| 8  | Temiz (2018)[34]      | Türkiye | Retrospective case-control | Preoperative RDW | 166  | 97   | 14.5%           | 79.16<br>D: 84.96<br>S: 79.5 | 1 year<br>3 months                        | Mortality status                                                                                                                                                        | No  |
| 9  | Wei-Hsiang (2021)[35] | China   | Prospective cohort         | Preoperative RDW | 203  | 89   | 13.35%          | 71.75<br>D: 72.04<br>S: 71.7 | 30 days                                   | Multivariate Cox proportional Hazard analysis using age and gender for model A or age, gender, BMI, SBP, DBP, diabetes, hypertension, smoking, and drinking for model B | Yes |
| 10 | Zehir (2014)[36]      | Türkiye | Retrospective cohort       | Preoperative RDW | 316  | 183  | 14.5%           | 77.86<br>D: 84.96<br>S: NA   | 1 year<br>6 months<br>3 months<br>30 days | NR                                                                                                                                                                      | No  |

RDW: red blood cell distribution width; NR: not reported; HR: hazard ratio; D: death; S: survival, WBC: White blood cell, MPV: Mean platelet volume, ASA: American Society of Anaesthesiologists, CCI: Charlson comorbidity index, GI: Gastrointestinal, BMI: Body mass index, SBP: systolic blood pressure, DBP: diastolic blood pressure,

**Table S2.** Risk of bias assessment for cohort studies (Newcastle-Ottawa Scale)

| Study                  | Selection                                                                                          |                                                                                |                           |                                                       | Comparability                                                                                                                                                                                                                                                                          | Outcome                      |                                            |                                                                                                                        |
|------------------------|----------------------------------------------------------------------------------------------------|--------------------------------------------------------------------------------|---------------------------|-------------------------------------------------------|----------------------------------------------------------------------------------------------------------------------------------------------------------------------------------------------------------------------------------------------------------------------------------------|------------------------------|--------------------------------------------|------------------------------------------------------------------------------------------------------------------------|
|                        | Representativeness of Exposed Cohort                                                               | Selection of the Non-exposed cohort from the same source as the exposed cohort | Ascertainment of Exposure | Outcome of interest was not present at Start of Study | Comparability of cohorts                                                                                                                                                                                                                                                               | Assessment of outcome        | Follow-up long enough for outcome to occur | Adequacy of follow-up                                                                                                  |
| Cruz-Vargas (2019)[14] | Participants were truly representative of elderly patients with hip fractures among the community. | Yes                                                                            | Hospital records          | Yes                                                   | Cox multivariate regression was performed. Confounders were not clearly reported                                                                                                                                                                                                       | Independent blind assessment | Yes                                        | 100% complete follow-up                                                                                                |
| Garbharran (2013)[11]  | Participants were truly representative of patients with hip fractures among the community.         | Yes                                                                            | Secure records            | Yes                                                   | Admission RDW, Hemoglobin, MCV, age, sex, prefracture residence, supporting indoor mobilization, ASA score $\geq 3$ , CCI, postoperative delirium, cardiac, respiratory, and GI complications, serum creatinine $>120\text{mmol/l}$ for Cox proportional hazards multivariate analysis | Independent blind assessment | Yes                                        | 100% participants in 1-year follow-up                                                                                  |
| Hamdan (2021)[32]      | Participants were truly representative of patients with hip fractures among community.             | Yes                                                                            | Medical records           | Yes                                                   | Age, gender, RDW grouped values, type of fracture, and the presence of cardiovascular disease for multivariate regression analysis                                                                                                                                                     | Independent blind assessment | Yes                                        | 92.3% of participants were included after excluding missing medical records, follow-up loss, and younger than 50 years |
| Karadeniz (2022)[33]   | Participants were truly representative                                                             | Yes                                                                            | No description            | Yes                                                   | Multivariate logistic regression was performed.                                                                                                                                                                                                                                        | No description               | Yes                                        | Complete follow-up                                                                                                     |

|                       |                                                                                            |     |                   |     |                                                                                                                                                                                                      |                              |     |                                                                                             |
|-----------------------|--------------------------------------------------------------------------------------------|-----|-------------------|-----|------------------------------------------------------------------------------------------------------------------------------------------------------------------------------------------------------|------------------------------|-----|---------------------------------------------------------------------------------------------|
|                       | of patients with hip fractures among community.                                            |     |                   |     | Confounders were not clearly reported.                                                                                                                                                               |                              |     |                                                                                             |
| Lv (2015)[12]         | Participants were truly representative of patients with hip fractures among the community. | Yes | Hospital database | Yes | Age, prior myocardial infarction, chronic renal failure, ASA score, treatment, in-hospital pneumonia, and in-hospital circulatory complication for Multivariable Cox hazardous proportional analysis | Telephone or medical records | Yes | 87.77% of participants were followed up at the final time point                             |
| Marom (2022)[13]      | Participants were truly representative of patients with hip fractures among community.     | Yes | Medical records   | Yes | Comorbidities, serum analysis, surgeon seniority for multivariate logistic regression model                                                                                                          | Independent blind assessment | Yes | 91.24% of participants were included after excluding 151 missing data                       |
| Wei-Hsiang (2021)[35] | Participants were truly representative of patients with hip fractures among the community. | Yes | Medical records   | Yes | Multivariate Cox proportional Hazard analysis using age and gender for model A or age, gender, BMI, SBP, DBP, diabetes, hypertension, smoking, and drinking for model B                              | Independent blind assessment | Yes | 60.78% of participants complete the follow-up with a detailed description of follow-up loss |
| Zehir (2014)[36]      | Participants were truly representative of patients with hip fractures among community.     | Yes | No description    | Yes | Not reported                                                                                                                                                                                         | No description               | Yes | Complete follow-up                                                                          |

RDW: red blood cell distribution width, MCV: mean corpuscular volume, ASA: American Society of Anaesthesiologists, CCI: Charlson comorbidity index, GI: Gastrointestinal, BMI: Body mass index, SBP: systolic blood pressure, DBP: diastolic blood pressure

**Table S3.** Risk of bias assessment for case-control studies (Newcastle-Ottawa Scale)

| Study              | Selection                        |                                            |                       |                        | Comparability                                                                                                                                                                                           | Exposure                  |                                                     |                           |
|--------------------|----------------------------------|--------------------------------------------|-----------------------|------------------------|---------------------------------------------------------------------------------------------------------------------------------------------------------------------------------------------------------|---------------------------|-----------------------------------------------------|---------------------------|
|                    | Is the case definition adequate? | Representativeness of the cases            | Selection of controls | Definition of controls | Comparability of cases and controls                                                                                                                                                                     | Ascertainment of exposure | Same method of ascertainment for cases and controls | Non-response rate         |
| Emektar (2017)[31] | Yes                              | Consecutive representative series of cases | Hospital controls     | Yes                    | Mortality vs survival at one-year follow-up<br><br>Age, sex, comorbidities, hemoglobin, WBC count, lymphocyte count, neutrophil count, MPV, RDW, type of fracture for multivariate Cox regression model | Hospital database         | Yes                                                 | Non respondents described |
| Temiz (2018)[34]   | Yes                              | Consecutive representative series of cases | Hospital controls     | Yes                    | Mortality status                                                                                                                                                                                        | Medical records           | Yes                                                 | Non respondents described |

WBC: White blood cell, MPV: mean platelet volume, RDW: Red blood cell distribution width

## Supplementary Figures

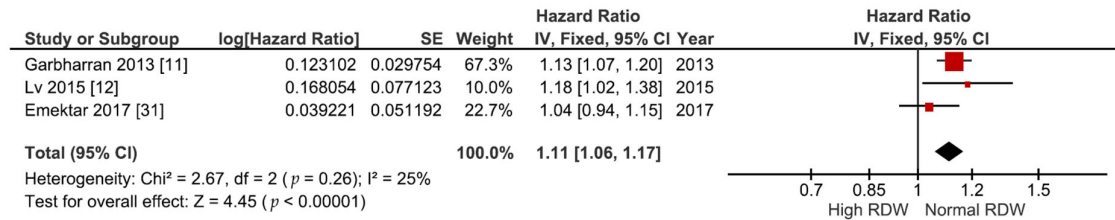

**Figure S1.** Forest plot of the association between RDW and >1-year mortality risk after hip fractures

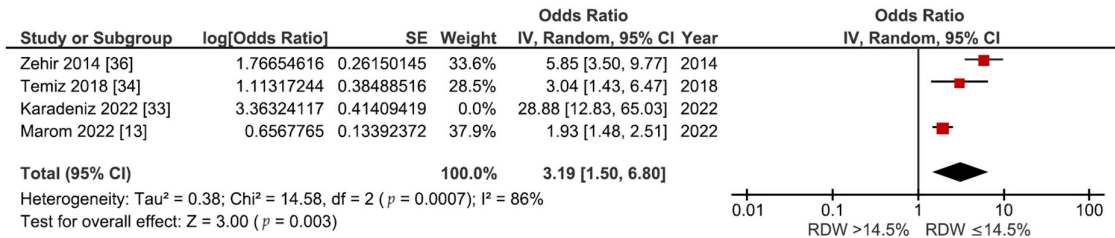

**Figure S2.** Forest plot of the association between RDW and 1-year mortality risk following hip fractures after sensitivity analysis

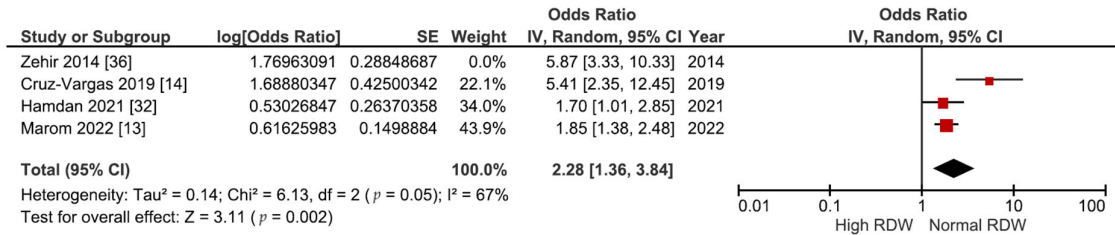

**Figure S3.** Forest plot of the association between RDW and 6-month mortality risk following hip fractures after sensitivity analysis
